# Supplementary material for: A Comparison of Clinicopathologic Outcomes Across Neoadjuvant and Adjuvant Treatment Modalities in Resectable Gastric Cancer
Source: PubMed Central journal article supplement (PMC8665367; doi:10.1001/jamanetworkopen.2021.38432), 2021-12-10
Supplement: jamanetwopen-e2138432-s001.pdf [file jamanetwopen-e2138432-s001.pdf]

## Supplemental Online Content

Anderson E, LeVee A, Kim S, et al. A comparison of clinicopathologic outcomes across neoadjuvant and adjuvant treatment modalities in resectable gastric cancer. *JAMA Netw Open*. 2021;4(12):e2138432. doi:10.1001/jamanetworkopen.2021.38432

**eFigure.** Consolidated Standards of Reporting Trials Diagram of Study Inclusion and Exclusion Criteria

**eTable.** Overall Survival by Treatment Group

This supplemental material has been provided by the authors to give readers additional information about their work.

**eFigure.** Consolidated Standards of Reporting Trials Diagram of Study Inclusion and Exclusion Criteria

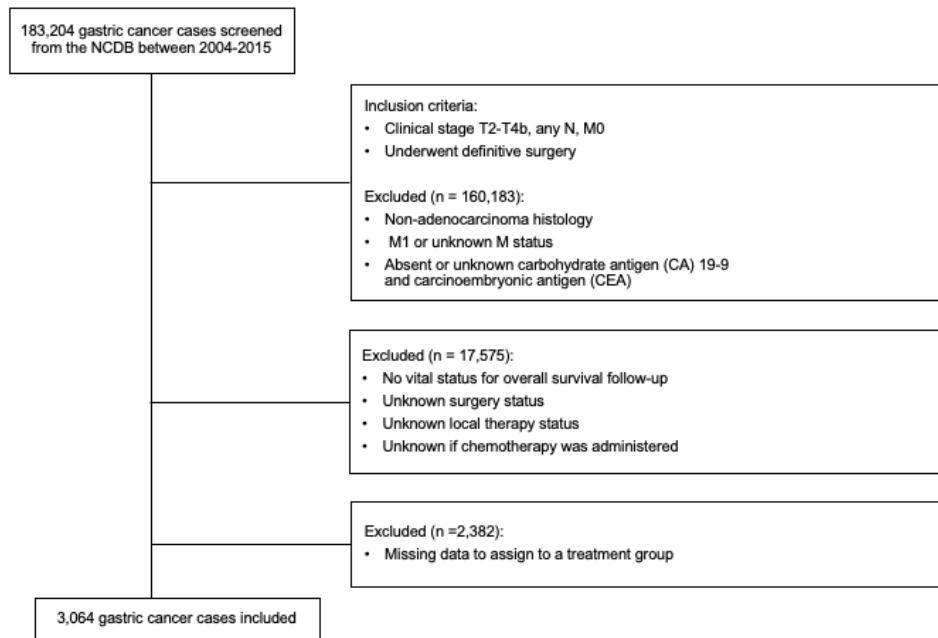

**eTable.** Overall Survival by Treatment Group

**Treatment groups include neoadjuvant chemoradiation only (nCRT), neoadjuvant chemotherapy only (nCT), adjuvant chemotherapy only (aCT), adjuvant chemoradiation only (acRT), neoadjuvant chemotherapy and adjuvant radiation (nCTaRT), chemotherapy with timing unknown (CTTU), chemoradiation therapy with timing unknown (CRTTU), radiation therapy with timing unknown (RTTU), and no perioperative therapy (NT).**

| <b>Treatment Timeline groups</b> | <b>No. of Subjects</b> | <b>Median Survival in Months (95% CI)</b> | <b>Estimated 2-year Survival Rate (95% CI)</b> |
|----------------------------------|------------------------|-------------------------------------------|------------------------------------------------|
| nCT                              | 641                    | 27.93 (23.59, 31.41)                      | 53.73% (49.67%, 57.61%)                        |
| nCRT                             | 85                     | 39.13 (26.87, NA)                         | 63.64% (52.26%, 73.01%)                        |
| aCT                              | 353                    | 36.14 (28.88, 49.18)                      | 59.69% (54.21%, 64.74%)                        |
| acRT                             | 658                    | 31.74 (27.1, 40.51)                       | 56.00% (51.99%, 59.81%)                        |
| nCTaRT                           | 112                    | 24.51 (17.51, 36.21)                      | 51.85% (42.11%, 60.72%)                        |
| CTTU                             | 540                    | 53.88 (44.45, 61.04)                      | 65.60% (61.32%, 69.52%)                        |
| CRTTU                            | 50                     | 28.09 (11.96, NA)                         | 52.58% (37.59%, 65.55%)                        |
| RTTU                             | 23                     | 4.225 (2.53, 18.6)                        | 29.83% (12.19%, 49.90%)                        |
| NT                               | 599                    | 12.32 (10.41, 14.59)                      | 36.84% (32.79%, 40.89%)                        |
